# Supplementary material for: Pathogenic Mitochondrial DNA Mutations Are Common in the General Population
Source: PubMed Central journal article supplement (PMC2495064; doi:10.1016/j.ajhg.2008.07.004), 2008-08-01
Supplement: mmc1.pdf [file mmc1.pdf]

## Supplemental Data

### Pathogenic Mitochondrial DNA Mutations

### Are Common in the General Population

Hannah R. Elliott, David C. Samuels, James A. Eden, Caroline L. Relton, and Patrick F. Chinnery

**Table S1. Nucleotide Base Calls for Specific mtDNA Mutations by MALDI-TOF MS**

| Percentage Heteroplasmy | MALDI-TOF MS base call |           |           |           |            |           |            |            |            |
|-------------------------|------------------------|-----------|-----------|-----------|------------|-----------|------------|------------|------------|
|                         | m.7445A>G              | m.3243A>G | m.8344A>G | m.8993T>G | m.13513G>A | m.3460G>A | m.11778G>A | m.14459G>A | m.14484T>C |
| 100.0                   | G                      | G         | G         | G         | A          | A         | A          | A          | C          |
| 88.2                    |                        |           |           |           | GA         |           |            |            |            |
| 85.2                    |                        |           |           | TG        |            |           |            |            |            |
| 80.2                    |                        |           |           |           |            |           |            | GA         |            |
| 77.1                    |                        |           |           |           |            |           |            |            | CT         |
| 73.2                    |                        |           |           |           |            | GA        |            |            |            |
| 72.0                    |                        |           | AG        |           |            |           |            |            |            |
| 71.9                    |                        |           |           |           | GA         |           |            |            |            |
| 70.5                    |                        |           |           | TG        |            |           |            |            |            |

AJHG, Volume 83

|      |    |    |    |    |    |    |    |    |    |
|------|----|----|----|----|----|----|----|----|----|
| 65.8 | AG |    |    |    |    |    |    |    |    |
| 61.8 |    |    |    |    | GA |    |    |    |    |
| 58.8 |    |    | AG |    |    |    |    |    |    |
| 53.4 |    |    |    |    | GA |    |    |    |    |
| 52.8 |    |    |    | TG |    |    |    |    |    |
| 49.7 |    |    |    |    |    |    |    |    | CT |
| 48.7 |    |    |    |    |    |    |    | GA |    |
| 48.7 |    |    |    | TG |    |    |    |    |    |
| 47.7 |    |    |    |    |    |    |    |    | CT |
| 47.3 |    | AG |    |    |    |    |    |    |    |
| 47.1 |    |    |    |    |    |    |    | GA |    |
| 46.0 |    |    |    |    |    | GA |    |    |    |
| 38.2 |    |    |    |    |    |    | GA |    |    |
| 35.3 | AG |    |    |    |    |    |    |    |    |
| 34.2 |    |    | AG |    |    |    |    |    |    |
| 32.1 |    |    |    |    | GA |    |    |    |    |
| 29.6 |    |    |    | TG |    |    |    |    |    |
| 26.9 |    | AG |    |    |    |    |    |    |    |
| 26.6 |    |    | AG |    |    |    |    |    |    |

AJHG, Volume 83

|      |    |    |  |    |    |    |    |    |    |
|------|----|----|--|----|----|----|----|----|----|
| 25.1 |    |    |  | TG |    |    |    |    |    |
| 24.8 |    | AG |  |    |    |    |    |    |    |
| 24.8 |    |    |  |    |    | GA |    |    |    |
| 24.3 |    |    |  |    |    |    |    | GA |    |
| 22.4 |    |    |  |    |    |    |    |    | CT |
| 22.3 |    |    |  |    |    | GA |    |    |    |
| 18.0 |    |    |  | TG |    |    |    |    |    |
| 16.9 |    |    |  |    |    |    |    | GA |    |
| 15.7 | AG |    |  |    |    |    |    |    |    |
| 14.7 |    |    |  |    | GA |    |    |    |    |
| 14.2 |    |    |  |    |    |    | GA |    |    |
| 13.9 |    |    |  |    |    | GA |    |    |    |
| 13.7 |    |    |  |    |    |    |    |    | CT |
| 13.1 |    |    |  |    |    | GA |    |    |    |
| 12.8 |    |    |  |    |    |    | GA |    |    |
| 12.0 |    |    |  |    |    |    |    |    | CT |
| 11.6 |    |    |  |    |    |    |    | GA |    |
| 9.8  |    |    |  |    |    | GA |    |    |    |
| 9.8  |    |    |  |    |    |    | GA |    |    |

AJHG, Volume 83

|     |    |    |    |    |   |   |  |    |   |
|-----|----|----|----|----|---|---|--|----|---|
| 9.7 |    | AG |    |    |   |   |  |    |   |
| 9.7 |    |    | AG |    |   |   |  |    |   |
| 9.2 |    |    |    |    |   |   |  | GA |   |
| 9.2 |    |    |    |    | U |   |  |    |   |
| 8.9 |    |    |    |    |   |   |  | GA |   |
| 8.1 |    |    |    |    |   |   |  |    | T |
| 7.7 | AG |    |    |    |   |   |  |    |   |
| 7.5 |    |    |    |    | U |   |  |    |   |
| 7.4 | AG |    |    |    |   |   |  |    |   |
| 7.3 |    |    |    | TG |   |   |  |    |   |
| 7.2 |    | A  |    |    |   |   |  |    |   |
| 6.3 |    |    |    |    | G |   |  |    |   |
| 5.7 |    |    |    |    |   |   |  |    | T |
| 5.6 |    |    |    |    |   |   |  | G  |   |
| 5.5 |    |    |    |    |   |   |  |    | T |
| 5.3 |    |    |    |    |   | G |  |    |   |
| 5.1 |    |    | AG |    |   |   |  |    |   |
| 4.6 |    |    |    |    |   | G |  |    |   |
| 4.4 |    | A  |    |    |   |   |  |    |   |

|     |   |   |   |   |   |    |   |  |
|-----|---|---|---|---|---|----|---|--|
| 4.0 | A |   |   |   |   |    |   |  |
| 3.8 |   | A |   |   |   |    |   |  |
| 3.4 |   |   | A |   |   |    |   |  |
| 3.4 |   |   |   |   |   |    | G |  |
| 3.3 |   |   |   |   |   | GA |   |  |
| 2.7 |   |   |   |   | G |    |   |  |
| 2.5 | A |   |   |   |   |    |   |  |
| 2.2 |   |   |   |   |   | GA |   |  |
| 1.8 |   | A |   |   |   |    |   |  |
| 1.8 |   |   |   | U |   |    |   |  |
| 1.7 |   | A |   |   |   |    |   |  |
| 1.5 |   |   |   |   |   |    | G |  |
| 1.4 |   |   | A |   |   |    |   |  |
| 1.4 | A |   |   |   |   |    |   |  |
| 1.3 |   |   |   |   |   | GA |   |  |
| 1.2 |   |   | A |   |   |    |   |  |
| 1.1 | A |   |   |   |   |    |   |  |
| 1.0 |   |   |   |   |   | GA |   |  |
| 0.9 |   | A |   |   |   |    |   |  |

|     |   |   |   |    |   |   |    |   |   |
|-----|---|---|---|----|---|---|----|---|---|
| 0.7 |   |   |   | TG |   |   |    |   |   |
| 0.5 |   |   |   |    |   |   | GA |   |   |
| 0.4 |   |   |   |    |   |   | G  |   |   |
| 0.3 |   |   |   |    |   |   | G  |   |   |
| 0.0 | A | A | A | T  | G | G | G  | G | T |

Nucleotide base calls for specific mtDNA mutations by MALDI-TOF MS (Sequenom™, San Diego, CA). Test samples were generated from cloned mtDNA from one subject, and mixed in varying proportions. For nine mutations, the percentage mutated mtDNA in the mixed clone sample was determined by last-cycle fluorescent PCR (Materials and Methods). The detection threshold for the m.1555A>G could not be quantified due to lack of an efficient fluorescent RFLP assay. However, dilution curves similar to those demonstrated estimated the assay to be efficient in detecting low levels of heteroplasmy. Quantification by cloning and sequencing mtDNA fragments of the lowest dilution positively identified by MALDI-TOF MS indicated the threshold of detection for m.1555A>G was 1.4% (1 of 70 independent clones). Coloured shading (pink, yellow, orange and blue) indicates the mutations grouped together in a multiplex primer extension reaction. Green shading = heteroplasmy levels where the mutated base was detected by MALDI-TOF MS, with the base call as specified.

**Table S2. Oligonucleotide Sequences Used for Quantification of Mitochondrial Heteroplasmy**

| Mutation   | Primer        | Restriction site        | RFLP         | RFLP         |
|------------|---------------|-------------------------|--------------|--------------|
|            | Position (np) | (np / enzyme)           | positive     | negative     |
| m.3243A>G  | 3155-3171     | +3244 <i>Hae III</i>    | 90, 72, 37   | 162, 37      |
|            | 3353-3334     |                         |              |              |
| m.8993T>G  | 8961-8980     | + 8991 <i>Hpa II</i>    | 109, 31      | 140          |
|            | 9100-9081     |                         |              |              |
| m.13513G>A | 13491-13512   | -13522 <i>MboII</i>     | 120          | 88, 32       |
|            | 13610-13592   |                         |              |              |
| m.1555A>G  | 1266-1282     | -1546 <i>BsmAI</i>      | 323          | 281, 42      |
|            | 1588-1569     |                         |              |              |
| m.8344A>G  | 8191-8212     | +8350 <i>BglI</i>       | 160, 40      | 200          |
|            | 8390-8345     |                         |              |              |
| m.3460G>A  | 3397-3419     | -3458 <i>BsaHI</i>      | 147, 17      | 102, 17, 45  |
|            | 3560-3538     |                         |              |              |
| m.11778G>A | 11618-11637   | +11774 <i>Tsp45I</i>    | 157, 188, 47 | 345, 47      |
|            | 12009-11990   |                         |              |              |
| m.14459G>A | 14265-14282   | -14439 <i>BtgZI</i>     | 250, 101     | 175, 101, 75 |
|            | 14614-14590   |                         |              |              |
| m.7445A>G  | 7408-7427     | - 7441 <i>Hpy188III</i> | 164          | 130, 34      |
|            | 7548-7571     |                         |              |              |
| m.14484T>C | 14460-14483   | -14481 <i>MboI</i>      | 235          | 213, 22      |
|            | 14675-14694   |                         |              |              |

Np = nucleotide positions refer to the revised Cambridge reference sequence (rCRS)<sup>1</sup>.  
 + = restriction site gain. - = restriction site loss. Fragment lengths detectable by  
 fragment analysis on the Beckman Coulter CEQ<sup>TM</sup> 8000 are displayed as base pairs in  
 length, highlighted in green.

**Table S3. Oligonucleotide Sequences for Sequencing of mtDNA D-Loop**

| Name | Sequence                                      | Primer<br>Position (np) |
|------|-----------------------------------------------|-------------------------|
| D1   | F5' TGAAAAACGACGGCCAGTATCGGAGGACAACCAGTAAG3'  | 15758- 15777            |
|      | R5' CAGGAAACAGCTATGACCTGGGTAGGTTTGTGGTATC3'   | 16294- 16274            |
| D2   | F5'TGAAAAACGACGGCCAGTCTCAACTATCACACATCAACTG3' | 16223- 16244            |
|      | R5' CAGGAAACAGCTATGACCAGATACTGCGACATAGGGTG3'  | 129- 110                |
| D3   | F5'TGAAAAACGACGGCCAGTTATTAACCACTCACGGGAGC3'   | 20-39                   |
|      | R5' CAGGAAACAGCTATGACC CTGGTTAGGCTGGTGTAGG3'  | 389- 370                |
| D4   | F5'TGAAAAACGACGGCCAGTGCCACAGCACTTAAACACATC3'  | 323- 343                |
|      | R5' CAGGAAACAGCTATGACCTGCTGCGTGCTTGATGCTTG3'  | 771- 752                |

Np = nucleotide positions refer to the revised Cambridge reference sequence (rCRS).<sup>1</sup>



## Supplemental Reference

1. Andrews RM, Kubacka I, Chinnery PF, Lightowlers RN, Turnbull DM, Howell N. Reanalysis and revision of the Cambridge reference sequence for human mitochondrial DNA [letter]. *Nat Genet.* 1999;23:147.
